# Three-dimensional random walk models of individual animal movement and their application to trap counts modelling

DA Ahmed<sup>1</sup>, S Benhamou<sup>2</sup>, MB Bonsall<sup>3</sup> and SV Petrovskii<sup>4</sup>

<sup>1</sup>Center for Applied Mathematics and Bioinformatics (CAMB), Department of Mathematics and Natural Sciences, Gulf University for Science and Technology, P.O. Box 7207, Hawally 32093, Kuwait

<sup>2</sup>Centre d'Ecologie Fonctionnelle et Evolutive, CNRS, Montpellier, France, and Cogitamus lab

<sup>3</sup>Mathematical Ecology Research Group, Department of Zoology, University of Oxford, Mansfield Road, OX1 3SZ, Oxford, UK

<sup>3</sup>Department of Mathematics, University of Leicester, University road, Leicester, LE1 7RH, UK

July 20, 2020

## 1 **Keywords:**

2 3D random walks, Simple random walk, Correlated random walk, Biased random walk, Animal move-  
3 ment, Trapping, Optimal trap efficiency.

## 4 **Abstract**

5 **Background:** Random walks (RWs) have proved to be a powerful modelling tool in ecology, particu-  
6 larly in the study of animal movement. An application of RW concerns trapping which is the predomi-  
7 nant sampling method to date in insect ecology, invasive species, and agricultural pest management. A  
8 lot of research effort has been directed towards modelling ground-dwelling insects by simulating their  
9 movement in 2D, and computing pitfall trap counts, but comparatively very little for flying insects with  
10 3D elevated traps.

11 **Methods:** We introduce the mathematics behind 3D RWs and present key metrics such as the mean  
12 squared displacement (MSD) and path sinuosity, which are already well known in 2D. We develop the

---

<sup>1</sup>Ahmed.D@gust.edu.kw, <sup>2</sup>simon.benhamou@cefe.cnrs.fr, <sup>3</sup>michael.bonsall@zoo.ox.ac.uk, <sup>4</sup>sp237@le.ac.uk

13 mathematical theory behind the 3D correlated random walk (CRW) which involves short-term direc-  
14 tional persistence and the 3D Biased random walk (BRW) which introduces a long-term directional bias  
15 in the movement so that there is an overall preferred movement direction. In this study, we consider  
16 three types of shape of 3D traps, which are commonly used in ecological field studies; a spheroidal  
17 trap, a cylindrical trap and a rectangular cuboidal trap. By simulating movement in 3D space, we in-  
18 vestigated the effect of 3D trap shapes and sizes and of movement diffusion on trapping efficiency.

19 **Results:** We found that there is a non-linear dependence of trap counts on the trap surface area or vol-  
20 ume, but the effect of volume appeared to be a simple consequence of changes in area. Nevertheless,  
21 there is a slight but clear hierarchy of trap shapes in terms of capture efficiency, with the spheroidal  
22 trap retaining more counts than a cylinder, followed by the cuboidal type for a given area. We also  
23 showed that there is no effect of short-term persistence when diffusion is kept constant, but trap counts  
24 significantly decrease with increasing diffusion.

25 **Conclusion:** Our results provide a better understanding of the interplay between the movement pattern,  
26 trap geometry and impacts on trapping efficiency, which leads to improved trap count interpretations,  
27 and more broadly, has implications for spatial ecology and population dynamics.

## 28 1 Introduction

29 Modelling individual animal movement and navigation strategies using random walks has long been a  
30 successful tradition in movement ecology (Nathan et al., 2008). The earliest models considered animal  
31 paths as uncorrelated and unbiased, e.g. Simple Random Walks (SRW) (Lin and Segel, 1974; Okubo,  
32 1980). A natural extension known as the Correlated Random Walk (CRW), firstly conceived by Patlak  
33 (1953) and later developed by others (Hall, 1977; Kareiva and Shigesada, 1983; Bovet and Benhamou,  
34 1988; Benhamou, 2004), allows for correlation between the orientations of successive steps, resulting in  
35 a short term localized directional bias known as ‘forward persistence’. This provides a more realistic  
36 description, as animals in the short term are more likely to keep moving in the same direction than to  
37 perform abrupt turns. Alternatively, a movement can show a consistent long term directional bias reflecting  
38 an overall preferred direction. This type of movement is known as a Biased Random Walk (BRW) (Marsh  
39 and Jones, 1988). If both short and long term biases are combined we obtain a Biased Correlated Random  
40 Walk (BCRW), (Benhamou, 2006; Codling et al., 2008; Bailey et al., 2018).

41 A tractable link between the 2D balanced CRW (i.e. left and right turns are equiprobable) and the  
42 mean squared displacement (MSD) was introduced by [Tchen \(1952\)](#) with constant step length, and later  
43 by [Hall \(1977\)](#) for variable step length. This helped bridge the gap between theory and field data, by  
44 providing a measure of the spatial spread of a population with the path length in terms of simple statistical  
45 moments. [Kareiva and Shigesada \(1983\)](#) further extended these results for a non-balanced 2D CRW. By  
46 comparing the observed MSD against that computed from theory, one could determine how well the CRW  
47 model predicted real animal movement ([Weiss, 1994](#); [Codling et al., 2008](#)). This gave rise to a multitude  
48 of studies which successfully modelled the movement of a variety of species using the CRW, with many  
49 examples, including beetles ([Byers, 2001](#)), butterflies ([Schultz and Crone, 2001](#)), Elk ([Morales et al., 2004](#);  
50 [Fortin et al., 2005](#)), grey seals ([McClintock et al., 2012](#)), and many others.

51 With cutting-edge developments in tagging and sensor technology, it is now possible to obtain ac-  
52 curate and refined 3D movement data, used to infer individual posture and heading (or 3D orientation).  
53 Measures of azimuthal, elevation and bank angles can be obtained through the usage of accelerometers  
54 and magnetometers, whereas, gyrometers can provide direct measures of rotations such as yaw, pitch and  
55 roll ([Williams et al., 2020](#)). Alongside this, there has been an increase in the number of studies which  
56 focus on 3D animal movements ([Voeselek et al., 2016](#); [Le Bras et al., 2017](#); [de Margerie et al., 2018](#)).  
57 In light of the above context, an extension to the results conceived by [Hall \(1977\)](#) to 3D is evidently due.  
58 Recently, [Benhamou \(2018\)](#) derived a mathematical expression for a key metric, namely, the MSD of the  
59 balanced CRW in 3D space (which can easily be extended to BRWs), and also path sinuosity, which is  
60 directly linked to the MSD of CRWs and expresses the amount of turning associated with a given path  
61 length. This sets the stage for 3D CRWs and 3D BRWs to be tested as null models that could hypothet-  
62 ically provide a more realistic framework for swimming, burrowing and flying animals - due to the mere  
63 fact that movement is exercised in an additional (third) direction. Once the above movement models are  
64 formalised, these can then be used as a baseline for a theoretical insight into the dynamics of trap counts.

65 Trapping is the predominant sampling method in insect ecology, invasive species, and agricultural pest  
66 management. Their usage covers a wide scope of ecological scenarios, including; general survey of in-  
67 sect diversity, detection of new invasive pests, delimitation of area of infestation, suppressing population  
68 buildup, monitoring populations of established pests, or even as a direct control measure, etc. ([Southwood,](#)  
69 [1978](#); [Radcliffe et al., 2008](#)). Since their original conception, many traps have been designed with mod-

70 ifications to cater for particular species, habitats, and research requirements (Muirhead-Thomson, 1991).  
71 Considerable progress has been made in modelling 2D pitfall trapping systems (Petrovskii et al., 2014),  
72 with recent efforts to standardize methodology (Brown and Matthews, 2016), however, few attempts can  
73 be found in the literature which analyse 3D elevated traps, albeit some efforts entirely based on simulations  
74 (Byers, 2011, 2012). We are interested in those traps used for flying insects. For this purpose, the main  
75 two types which are used in ecological studies are the ‘interception’ trap in the form of a net-like structure  
76 e.g. Malaise trap (tent-shaped; Lamarre et al., 2012), or ‘sticky’ traps usually coated with an adhesive.  
77 We focus on the latter, which, from a mathematical perspective, constitutes an enclosed shape with ab-  
78 sorbing surface. In agricultural studies, the most commonly used traps are sticky spheroidal, cylindrical,  
79 and cuboidal traps, particularly for faunal surveys (Taylor, 1962; Sivinski, 1990; Robacker and Rodriguez,  
80 2004; Epsky et al., 2004). Amongst these, the default choice is usually the sticky spherical trap, which is  
81 known to effectively trap a variety of taxa, e.g. *Tephritid* fruit flies, such as; apple maggot flies (*Rhago-*  
82 *letis pomonella*), blueberry maggot flies (*Rhagoletis mendax*), papaya fruit flies (*Toxotrypana curvicauda*  
83 *Gerstaecker*) and biting flies in the family *Tabanidae* (Sivinski, 1990; Duan and Prokopy, 1994; Mondor,  
84 1995; Kirkpatrick et al., 2017). It is also worth mentioning that other trap types do exist, but are used less  
85 frequently, for e.g. triangle (or wedge), diamond, cones and some others (Epsky et al., 2004), but usage  
86 largely depends on the target species.

87 In this paper, we provide the mathematical details behind modelling individual animal movement  
88 using a 3D SRW, and demonstrate how short/long term persistence mechanisms can be incorporated,  
89 for a more general and realistic 3D CRW or 3D BRW. Using the results from Benhamou (2018), we  
90 summarize important metrics, such as the MSD, and show how these RWs can be made equivalent in  
91 terms of diffusion. Using this 3D RW framework, we model the movement of animals in 3D space,  
92 with focus on trapping. We reveal that trap counts vary non-linearly as a function of trap surface area or  
93 volume, and provide analytic expressions useful for trap count estimation. Furthermore, we investigate the  
94 interplay between the trap shape and elongation of 3D traps, the movement behaviour and how this can  
95 induce changes in trapping efficiency. More specifically, we analyse the impact of trap geometry and how  
96 short-term correlations (‘micro-structure’) or diffusion (‘macro-structure’) can affect capture rates. Better  
97 understanding of trap count dynamics and catch patterns lead to improved trap count interpretations. More  
98 generally, the implications of our results are also relevant in other ecological contexts, for e.g. where trap

99 size can be thought of as odour plume reach (Miller et al., 2015).

## 100 2 Methods

### 101 2.1 3D Random Walks in Cartesian and Spherical co-ordinates

102 Individual animal movement can be modelled in 3D as a time series of locations  $\mathbf{x}_i = (x_i, y_i, z_i)$  recorded  
103 at discrete times  $t_i = \{t_0, t_1, t_2, \dots\}$ . The movement can therefore be seen as a series of discrete steps  
104  $\Delta\mathbf{x}_i = \mathbf{x}_i - \mathbf{x}_{i-1}$ . Any 3D RW can be described in spherical coordinates, by expressing the step vector in  
105 terms of step lengths  $l_i = \|\Delta\mathbf{x}_i\|$ , azimuthal angle  $\theta_i$  (equivalent to longitude) and polar angle  $\phi_i$  (equivalent  
106 to co-latitude), using the transformation:

$$\Delta x = l \cos(\theta) \sin(\phi), \Delta y = l \sin(\theta) \sin(\phi), \Delta z = l \cos(\phi), \quad l \in [0, \infty), \theta \in (-\pi, \pi], \phi \in [0, \pi] \quad (2.1.1)$$

107 The change of direction of an animal from heading  $(\theta_i, \phi_i)$ , between locations  $\mathbf{x}_{i-1}$  and  $\mathbf{x}_i$ , to heading  
108  $(\theta_{i+1}, \phi_{i+1})$ , between locations  $\mathbf{x}_i$  and  $\mathbf{x}_{i+1}$ , can be modelled as an orthodromic (or great circle) arc, char-  
109 acterized by two angles: the initial arc orientation  $\beta_i$ , measured between  $-\pi$  and  $\pi$  in the frontal plane  
110 with respect to the horizontal level, and the arc size  $\omega_i$ , measured between 0 and  $\pi$  in the plane defined by  
111 the two headings:

$$\omega_i = \cos^{-1}[\cos(\phi_i) \cos(\phi_{i+1}) + \sin(\phi_i) \sin(\phi_{i+1}) \cos(\theta_{i+1} - \theta_i)] \quad (2.1.2)$$

112 For a balanced CRW (including SRW as a special case) or BRW, the random variable  $\beta$  is independent  
113 of  $\omega$ , and its distribution must also be centrally symmetric so that its mean sine and cosine are both null.  
114 Whether short or long term directional persistence is incorporated into the RW can be realised through the  
115 mean cosine of  $\omega$ ,  $c_\omega$ : one gets  $c_\omega > 0$  for a balanced CRW and BRW and  $c_\omega = 0$  for a SRW. CRW and  
116 BRW can be further distinguished based on how the heading at any step is determined. For both types of  
117 walks it is drawn at random around a predefined 3D direction  $\boldsymbol{\mu}$ . For a CRW,  $\boldsymbol{\mu}$  corresponds to the heading  
118 at the previous step, whereas for a BRW,  $\boldsymbol{\mu}$  corresponds to the target direction. In this case, the arc size  
119 corresponding to the angular discrepancy between a given heading and the target direction will be referred

120 to as  $v$ , which is statistically related to the arc size between successive headings  $\omega$  through the relationship  
 121  $c_\omega = c_v^2$  as occurs with 2D BRW (Marsh and Jones, 1988; Benhamou, 2006; Codling et al., 2008).

122 The Mean Squared Displacement (MSD),  $\mathbb{E} [R_n^2]$ , which is defined as the expected value of the squared  
 123 beeline distance between an animals' initial and final locations after  $n$  steps, serves as a useful metric to  
 124 analyse movement patterns. The general MSD formulation for 2D CRW (Kareiva and Shigesada, 1983;  
 125 Benhamou, 2006), in which left and right turns are not necessarily balanced, is extremely complex. We  
 126 will consider here its extension in 3D space only for balanced CRW, developed by Benhamou (2018), and  
 127 which reads:

$$\mathbb{E} [R_n^2] = n\mathbb{E} [l^2] + 2\mathbb{E}[l]^2 \frac{c_\omega}{1 - c_\omega} \left( n - \frac{1 - c_\omega^n}{1 - c_\omega} \right), \quad (2.1.3)$$

128 For a large step number  $n$ , the MSD approaches:

$$\mathbb{E} [R_n^2]_a = n \left( \mathbb{E} [l^2] + 2\mathbb{E}[l]^2 \frac{c_\omega}{1 - c_\omega} \right) = L\mathbb{E}[l] \left( \frac{1 + c_\omega}{1 - c_\omega} + \gamma^2 \right), \quad (2.1.4)$$

129 where  $L = n\mathbb{E}[l]$  is the mean path length and  $\gamma = \sqrt{\frac{\mathbb{E}[l^2]}{\mathbb{E}[l]^2} - 1}$  is the coefficient of variation of step length.  
 130 For a 3D SRW, with  $c_\omega = 0$ , the MSD reduces to  $\mathbb{E} [R_n^2] = n\mathbb{E} [l^2]$ , whatever the step number. It is  
 131 readily seen from equation (2.1.4) that the MSD is asymptotically proportional to  $n$ , and therefore the  
 132 walk becomes isotropically diffusive in the long term. The subscript 'a' is included here to represent the  
 133 asymptotic value to which the MSD tends when  $n$  increases indefinitely. For an isotropically diffusive  
 134 RW, the MSD is related to the diffusion coefficient  $D$  as follows:  $\mathbb{E} [R_n^2] = 2qDT_n$  where  $T_n$  is the duration  
 135 of the  $n$  step RW and  $q = 1, 2, 3$  corresponds to the number of dimensions (Crank, 1975; Turchin, 1998;  
 136 Sornette, 2004; Codling et al., 2008). The amount of turning in a random search path can be quantified by  
 137 the sinuosity index:

$$S = \sqrt{\frac{s}{D}} = \sqrt{\frac{2qn\mathbb{E}[l]}{\mathbb{E} [R_n^2]_a}}, \quad (2.1.5)$$

138 where  $s$  is the mean speed, with  $q = 3$  for a random walk in 3D space (Benhamou, 2006, 2018).

139 In the case of a BRW, headings are drawn independently of each other in the target direction. This

140 leads to the following expression for the MSD:

$$\mathbb{E}[R_n^2] = n\mathbb{E}[l^2] + n(n-1)\mathbb{E}[l]^2 c_\omega = n \underbrace{(\mathbb{E}[l^2] - \mathbb{E}[l]^2 c_\nu^2)}_{\text{diffusion term}} + \underbrace{n^2 \mathbb{E}[l]^2 c_\nu^2}_{\text{advection term}} \quad (2.1.6)$$

141 where  $\nu$  is the arc size between an heading and the target direction, which is statistically related to the arc  
 142 size between successive headings  $\omega$  through the relationship  $c_\omega = c_\nu^2$ . This expression highlights that a  
 143 BRW is essentially a combination of the diffusive random walk and a drift, and its MSD is dominated in  
 144 the long-term by the contribution of the drift. It is worth noting that the MSD expressions for balanced  
 145 CRW and BRW in 3D space are similar to those obtained in 2D space (Hall, 1977; Marsh and Jones,  
 146 1988). The only difference is that the mean cosine of turning angles that is used in 2D space is replaced by  
 147 the mean cosine of orthodromic arcs corresponding to the reorientations between successive 3D headings.

148 We can derive the conditions under which two 3D balanced CRWs are ‘equivalent’, in the sense that  
 149 they have the same MSD after  $n$  steps, given that  $n$  is sufficiently large. In particular, if we consider a SRW  
 150 with step length  $l^*$  and mean cosine  $c_\omega^* = 0$ , assuming the same coefficient of variation of step length and  
 151 the same mean path length  $L$ , we obtain the following ‘condition of equivalence’:

$$\frac{\mathbb{E}[l^*]}{\mathbb{E}[l]} = \frac{1 + \left(\frac{1-\gamma^2}{1+\gamma^2}\right) c_\omega}{1 - c_\omega}. \quad (2.1.7)$$

152 Now consider a SRW and a BRW with step lengths  $l^*$  and  $l'$  and mean cosines  $c_\omega^* = 0$  and  $c'_\omega$ , respectively.  
 153 The condition of equivalence between these RWs in terms of diffusion is obtained with:

$$\frac{\mathbb{E}[l^*]}{\mathbb{E}[l']} = 1 - \frac{c'_\omega}{1 + \gamma^2}. \quad (2.1.8)$$

## 154 2.2 Mathematical bases for simulations of 3D RW

155 We relied on a distribution of step length so that the distributions of increments  $\Delta x$ ,  $\Delta y$ , and  $\Delta z$ , when  
 156 reorientations are purely random (SRW), are zero-centred Gaussian distributions with the same standard-  
 157 deviation  $\sigma$ , which represents the mobility of the animal. For a SRW with such increments, the probability  
 158 that the animal moves into an (infinitesimally) small vicinity of the current location  $\mathbf{x}$ , i.e within volume

159  $dV = d\Delta x d\Delta y d\Delta z = l^2 \sin(\phi) dl d\theta d\phi$ , is:

$$dP = \frac{l^2}{(\sigma\sqrt{2\pi})^3} \exp\left(-\frac{l^2}{2\sigma^2}\right) \sin(\phi) dl d\theta d\phi. \quad (2.2.1)$$

160 As  $l$ ,  $\theta$  and  $\phi$  are mutually independent random variables, one gets the following probability distribution  
161 functions for these variables:

$$\lambda(l) = \frac{2l^2}{\sigma^3\sqrt{2\pi}} \exp\left(-\frac{l^2}{2\sigma^2}\right), \quad \psi(\theta) = \frac{1}{2\pi}, \quad \eta(\phi) = \frac{\sin(\phi)}{2}. \quad (2.2.2)$$

162 The mean step length is  $\mathbb{E}[l] = \frac{4\sigma}{\sqrt{2\pi}}$  and mean squared step length  $\mathbb{E}[l^2] = 3\sigma^2$ . The coefficient of  
163 variation is therefore  $\gamma = \sqrt{\frac{3\pi}{8} - 1}$ . Note that, as expected,  $\lambda(l)$  can be considered a transformation of the  
164 Chi distribution with 3 degrees of freedom, for re-scaled step lengths  $\tilde{l} = \frac{l}{\sigma}$  (Walck, 2007).

165 To specify the distributions of initial arc orientation  $\beta$  and arc size  $\omega$  in our simulations, we used the  
166 von-Mises Fisher distribution (vMF), which is the simplest type amongst the Generalized Fisher-Bingham  
167 family of spherical distributions (Kent, 1982). The vMF distribution on the  $(q-1)$ -dimensional sphere  
168  $\mathbb{S}^{q-1}$  in  $\mathbb{R}^q$  of the unit random vector  $\mathbf{z} = (z_1, z_2, \dots, z_q)$  is given by:

$$v_q(\mathbf{z}; \boldsymbol{\mu}, \kappa) = \frac{\kappa^{\frac{q}{2}-1}}{(2\pi)^{\frac{q}{2}} I_{\frac{q}{2}-1}(\kappa)} \exp(\kappa \boldsymbol{\mu} \cdot \mathbf{z}) \quad (2.2.3)$$

169 where  $\boldsymbol{\mu}$  is the mean direction with norm  $\|\boldsymbol{\mu}\| = 1$  and  $\kappa > 0$  is a measure of the concentration about  
170 the mean direction, and  $I_m$  denotes the modified Bessel function of the first kind of order  $m$ . For  $q = 2$ ,  
171 this corresponds to a particular type of distribution on a circle, known as the von Mises distribution. For  
172  $q = 3$  on the sphere  $\mathbb{S}^2$ , with  $I_{1/2}(\kappa) = \frac{2\sinh(\kappa)}{\sqrt{2\pi\kappa}}$  (Mardia et al., 1979), the probability density function of  
173 the endpoint of  $\mathbf{z}$  falling within the infinitesimal surface element with surface area  $ds$  is:

$$v_3(\mathbf{z}; \boldsymbol{\mu}, \kappa) ds = \frac{\kappa}{4\pi \sinh(\kappa)} \exp(\kappa \boldsymbol{\mu} \cdot \mathbf{z}) ds \quad (2.2.4)$$

174 Given that  $\boldsymbol{\mu}$  and  $\mathbf{z}$  are two unit vectors which deviate by  $\zeta$  from each other, one gets  $\boldsymbol{\mu} \cdot \mathbf{z} = \cos(\zeta)$ , with  
175  $\zeta = \omega$  for a balanced 3D CRW, where  $\boldsymbol{\mu}$  corresponds to the previous heading, or  $\zeta = \nu$  for a 3D BRW,  
176 where  $\boldsymbol{\mu}$  corresponds to the target direction. Furthermore, by setting the pole of the sphere at the endpoint



177 of  $\boldsymbol{\mu}$ , the infinitesimal surface element  $ds$  can be rewritten without loss of generality as  $\sin(\zeta)d\beta d\zeta$  as it  
 178 appears that  $\zeta$  then behaves as a co-latitude and  $\beta$  as a longitude. With  $\beta$  uniformly distributed between  
 179  $-\pi$  and  $\pi$ , one gets:

$$\psi(\beta) = \frac{1}{2\pi}, \quad \eta(\zeta; \kappa) = \frac{\kappa}{2 \sinh(\kappa)} e^{\kappa \cos(\zeta)} \sin(\zeta) \quad (2.2.5)$$

180 where  $\psi$  and  $\eta$  correspond to the probability distribution functions of the initial arc orientation and arc  
 181 size, respectively (Fisher et al., 1981; Mardia and Jupp, 2000), with:

$$c_\zeta = \coth(\kappa) - \frac{1}{\kappa}, \quad \kappa > 0. \quad (2.2.6)$$

182 In the limit  $\kappa \rightarrow 0$ , the distribution of the arc size simplifies to  $\eta(\zeta) = \frac{\sin(\zeta)}{2}$  with mean cosine  $c_\zeta = 0$ , as  
 183 expected for a SRW.

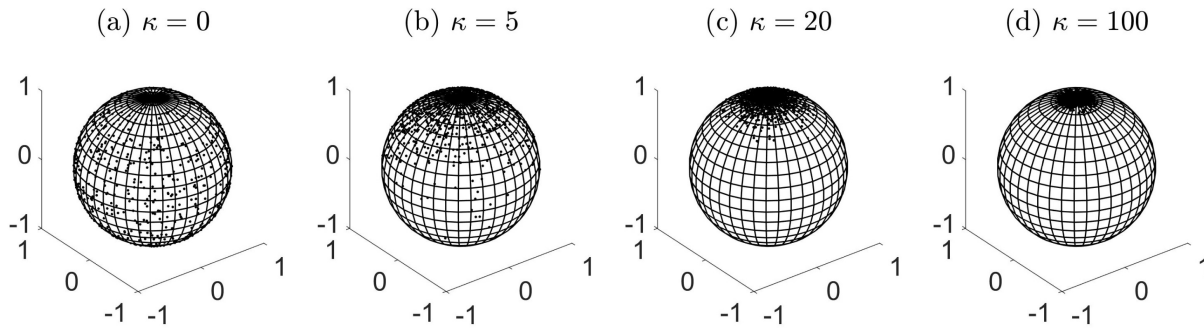

Figure 2.2.1: Random samples from the vMF distribution on a unit sphere  $\mathbb{S}^2$  with the pole as the mean direction  $\boldsymbol{\mu} = (0, 0, 1)$ , with increasing concentration parameter  $\kappa$ , based on 1000 simulated points.

184 In the case of a SRW, the points are uniformly distributed on the whole surface. For increasing  $\kappa$   
 185 values, the points are more concentrated towards the pole  $\boldsymbol{\mu}$ . Directional correlation is introduced to get  
 186 a 3D balanced CRW, by randomly generating a heading from a distribution where the mean direction  $\boldsymbol{\mu}$   
 187 corresponds to the previous heading, whereas a 3D BRW is obtained by randomly generating a heading  
 188 from a distribution where the mean direction  $\boldsymbol{\mu}$  corresponds to the target direction.

189 To tune the scale parameters of various CRW so that they are equivalent in terms of diffusion, we can  
 190 express equation (2.1.7) as:

$$\frac{\sigma^*}{\sigma} = \frac{1 + \left(\frac{16}{3\pi} - 1\right) c_\omega}{1 - c_\omega}. \quad (2.2.7)$$

191 In the long term, a CRW with scale parameter  $\sigma$  behaves as a SRW with scale parameter  $\sigma^*$ . The sinuosity

192 of both walks can therefore be expressed as:

$$S = \frac{2}{\sqrt{\sigma^*}} \left( \frac{2}{\pi} \right)^{\frac{1}{4}}. \quad (2.2.8)$$

193 Similarly, for a BRW with step length distribution parameter  $\sigma'$  and long term persistence parameter  $\kappa'$   
194 one gets:

$$\frac{\sigma^*}{\sigma'} = 1 - \frac{8}{3\pi} c_v^2. \quad (2.2.9)$$

195 with  $c_v = \coth(\kappa') - \frac{1}{\kappa'}$ .

## 196 **2.3 Modelling trapping**

197 In 3D trapping scenarios, consider a population of  $N$  individuals moving independently of each other. The  
198 path of each individual is modelled as a 3D RW in unbounded space, with initial location  $\mathbf{x}_0 = (x_0, y_0, z_0)$   
199 in proximity of a 3D trap. Each subsequent step is determined by the recurrence relation  $\mathbf{x}_i = \mathbf{x}_{i-1} + \Delta\mathbf{x}_i$ ,  
200 resulting in a RW which is governed by the type of probability distribution for the step vector ( $\Delta\mathbf{x}$ ), and its  
201 properties. We assume that each walker moves until it is trapped or has travelled a path of length  $L$ , which  
202 can be easily converted into time by considering the mean speed  $s$ . We introduce the concept of trapping  
203 by stating that at each step  $i$ , any individual which is within the confines of a trap is removed from the  
204 system, leading to trap counts or captures. Under such conditions, the trap surface is absorbing and the  
205 simulation allows cumulative trap counts  $\mathfrak{T}$  to be recorded. In our simulations, we assume the absence  
206 of mortality or reproduction, so that the population at each step can only decrease, due to trapping, or  
207 otherwise remains stable. As an example, Fig. 2.3.1 shows the distribution of the individuals over the 3D  
208 space after performing the random walk of a given length  $L$ .

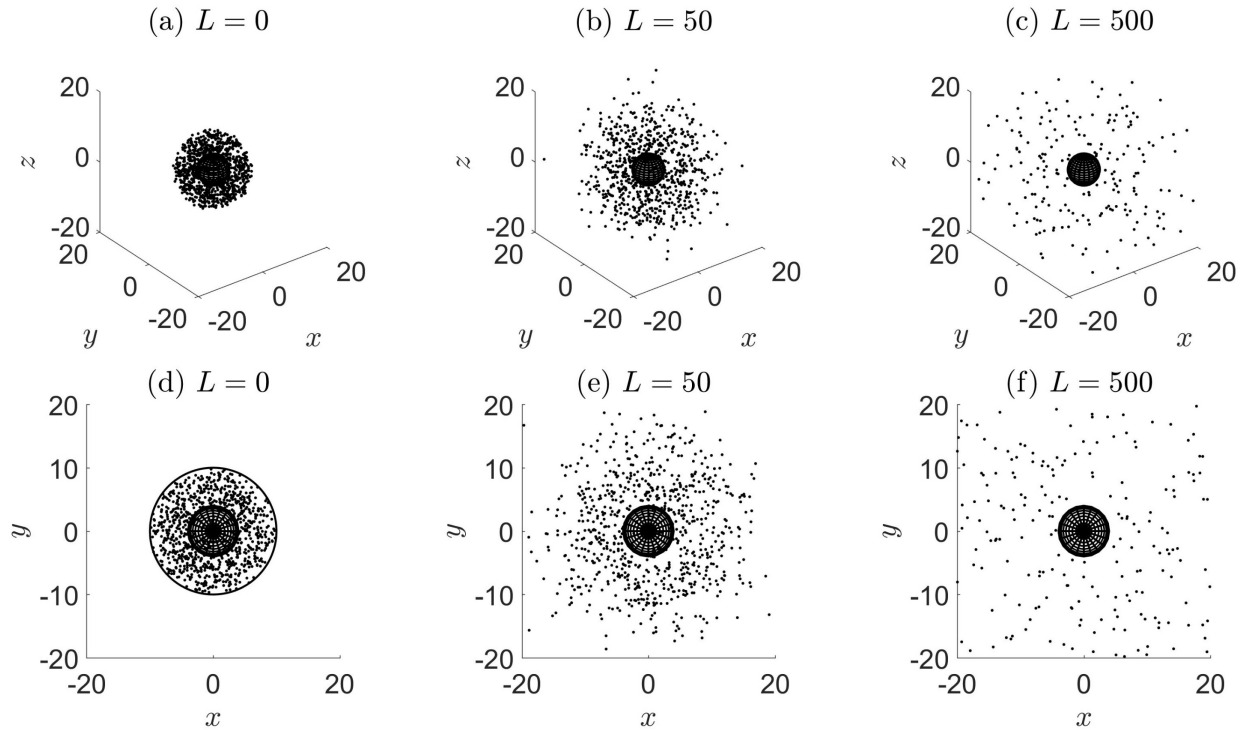

Figure 2.3.1: Evolution of the 3D spatial distribution for a population of  $N = 1000$  individuals, uniformly distributed at (a)  $L = 0$  (initial condition), within a distance  $R = 10$  from the centre of the spherical trap of radius  $r_s = 4$ . Each individual walker performs a SRW with Gaussian increments and mobility parameter  $\sigma^* = 1$  (corresponding to sinuosity  $S = 1.79$ ). Individual location is plotted until it is trapped or it travelled a path of maximum length (b)  $L = 50$  and (c)  $L = 500$ , corresponding to approximately  $n = 31,313$  steps, respectively. Plots (a)-(c) present a 3D view and (d)-(f) presents a top-down view of the above. The black circle in (d) is included to illustrate that the walkers are confined within the vicinity at  $L = 0$ , but later move in unbounded space.

209 In this study, we consider three shapes of 3D traps, namely the spheroid, cylindrical and rectangular  
 210 cuboid types with trap geometry  $\mathfrak{D}$  defined by the following:

- 211 1. Spheroid (i.e. ellipsoid of revolution) trap with equatorial radius  $r_s$  and polar radius  $h_s$ ,

$$\mathfrak{D}_s = \left\{ (x, y, z) \mid \frac{x^2 + y^2}{r_s^2} + \frac{z^2}{h_s^2} < 1 \right\}. \quad (2.3.1)$$

212 with the specific case  $r_s = h_s$  reduces to a spherical shaped trap.

- 213 2. Cylindrical trap with radius  $r_c$  and height  $h_c$ ,

$$\mathfrak{D}_c = \left\{ (x, y, z) \mid x^2 + y^2 < r_c^2, |z| < \frac{h_c}{2} \right\}. \quad (2.3.2)$$

214 3. Rectangular cuboid trap with square base of side length  $e_b$  and height  $h_b$ ,

$$\mathfrak{D}_b = \left\{ (x, y, z) \mid |x| < \frac{e_b}{2}, |y| < \frac{e_b}{2}, |z| < \frac{h_b}{2} \right\}, \quad (2.3.3)$$

215 with the specific case  $e_b = h_b$  reduces to a cube shaped trap.

216 Subscripts 's, c, b' refer to the spheroid, cylindrical, cuboid types, respectively.

217 For any trap type, we can specify its shape by introducing dimensionless elongation parameters. For the

218 spheroid, we considered the ratio of polar to equatorial radii  $\varepsilon_s = \frac{h_s}{r_s}$ , where  $\varepsilon_s < 1$  corresponds to an oblate

219 spheroid and  $\varepsilon_s > 1$  to a prolate spheroid. For the cuboid we considered the ratio of height to base side

220 length  $\varepsilon_b = \frac{h_b}{e_b}$ , where  $\varepsilon_b = 1$  corresponds to a cube, and for the cylinder we considered the ratio of height

221 to base diameter  $\varepsilon_c = \frac{h_c}{2r_c}$ .

222 We can then write expressions for the total surface area as:

$$A_s = 4\pi r_s^2 f(\varepsilon_s) \quad \text{where} \quad f(\varepsilon_s) = \begin{cases} \frac{1}{2} \left[ 1 + \frac{\varepsilon_s^2}{\sqrt{1-\varepsilon_s^2}} \operatorname{artanh} \left( \sqrt{1-\varepsilon_s^2} \right) \right], & \varepsilon_s < 1 \\ 1, & \varepsilon_s = 1 \\ \frac{1}{2} \left[ 1 + \frac{\varepsilon_s^2}{\sqrt{\varepsilon_s^2-1}} \arcsin \left( \frac{\sqrt{\varepsilon_s^2-1}}{\varepsilon_s} \right) \right], & \varepsilon_s > 1 \end{cases} \quad (2.3.4)$$

223

$$A_c = 2\pi r_c^2 (1 + 2\varepsilon_c), \quad A_b = 2e_b^2 (1 + 2\varepsilon_b), \quad (2.3.5)$$

224 and for volume:

$$V_s = \frac{4}{3} \pi \varepsilon_s r_s^3, \quad V_c = 2\pi \varepsilon_c r_c^3, \quad V_b = \varepsilon_b e_b^3. \quad (2.3.6)$$

225 We can also express volume as a function of area as:

$$V_s = \frac{\varepsilon_s}{6\sqrt{\pi}} \left( \frac{A_s}{f(\varepsilon_s)} \right)^{\frac{3}{2}}, \quad V_c = \frac{\varepsilon_c}{\sqrt{2\pi}} \left( \frac{A_c}{1 + 2\varepsilon_c} \right)^{\frac{3}{2}}, \quad V_b = \varepsilon_b \left( \frac{A_b}{2(1 + 2\varepsilon_b)} \right)^{\frac{3}{2}}. \quad (2.3.7)$$

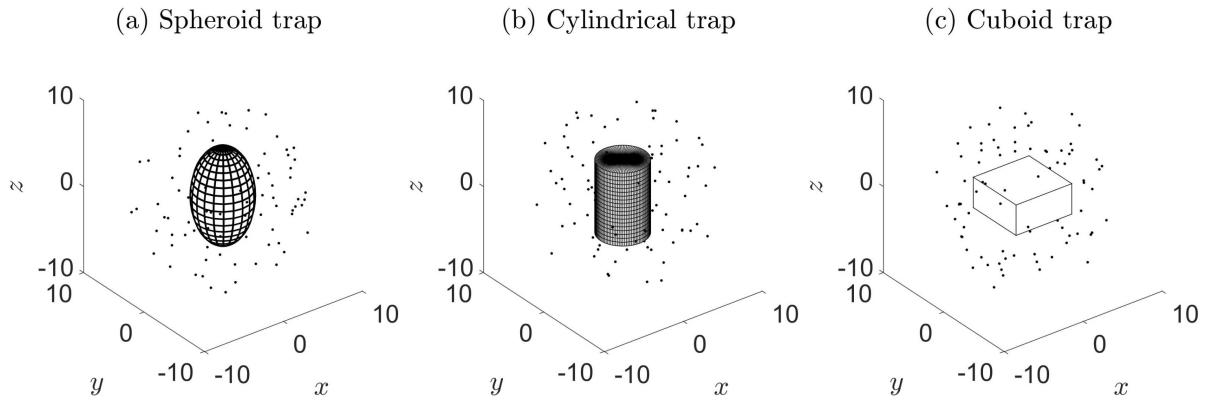

Figure 2.3.2: Illustration of the different trap shapes. (a) (Prolate) Spheroid trap: radius  $r_s = 3.27$ ,  $h_s = 5.56$ ,  $\varepsilon_s = 1.7$ , (b) Cylindrical trap: radius  $r_c = 2.82$ ,  $h_c = 8.46$ ,  $\varepsilon_c = 1.5$ , (c) Cuboid trap: base length  $e_b = 7.07$ ,  $h_b = 3.54$ ,  $\varepsilon_b = 0.5$ .  $N = 100$  individuals are initially uniformly distributed over the vicinity between the trap and a radial distance of  $R = 10$  measured from the centre of the trap. The dimensions are chosen so that the surface area,  $A$ , of each trap is approximately equal to 200, which is a necessary requirement to compare between these geometries (see explanation in §3.1).

226 The initial distribution of individual location is considered to be uniform over a vicinity, which is  
 227 defined as the space between the trap and some fixed outer distance  $R$ , measured from the centre of the  
 228 trap. In the case of a spherical trap, we can think of this as the 3D extension of uniformly distributed points  
 229 on an annulus, i.e. between two concentric spheres. If we describe initial location in spherical co-ordinates  
 230 as  $\mathbf{x}_0 = (r_0, \theta_0, \phi_0)$ , then the corresponding probability density functions can be written explicitly as:

$$\mathfrak{R}(r_0) = \frac{3r_0^2}{R^3 - r_s^3}, \quad \Theta(\theta_0) = \frac{1}{2\pi}, \quad \Phi(\phi_0) = \frac{\sin \phi_0}{2}. \quad (2.3.8)$$

231 Using the inverse transform technique (Grimmet and Stirzaker, 2001), the initial location of each individ-  
 232 ual can then easily be simulated by:

$$\mathbf{x}_0 \sim \left( \sqrt[3]{(R^3 - r_s^3)U + r_s^3}, 2\pi U, \arccos(1 - 2U) \right) \quad (2.3.9)$$

233 where  $U$  is a random variable drawn from the uniform distribution between 0 and 1.

234 In the case of other trap shape, the vicinity no longer has an infinite number of symmetry axes and  
 235 therefore, to simulate a homogeneous population is not as straightforward. In these cases, we draw the  
 236 initial locations at random in the whole sphere of radius  $R$ , and removed those occurring within the trap.

## 237 3 Results

### 238 3.1 Effect of trap shape type

239 Consider the usual simulation setting outlined in §2.3, for a spherical trap ( $\varepsilon_s = 1$ ) with increasing trap  
240 size.

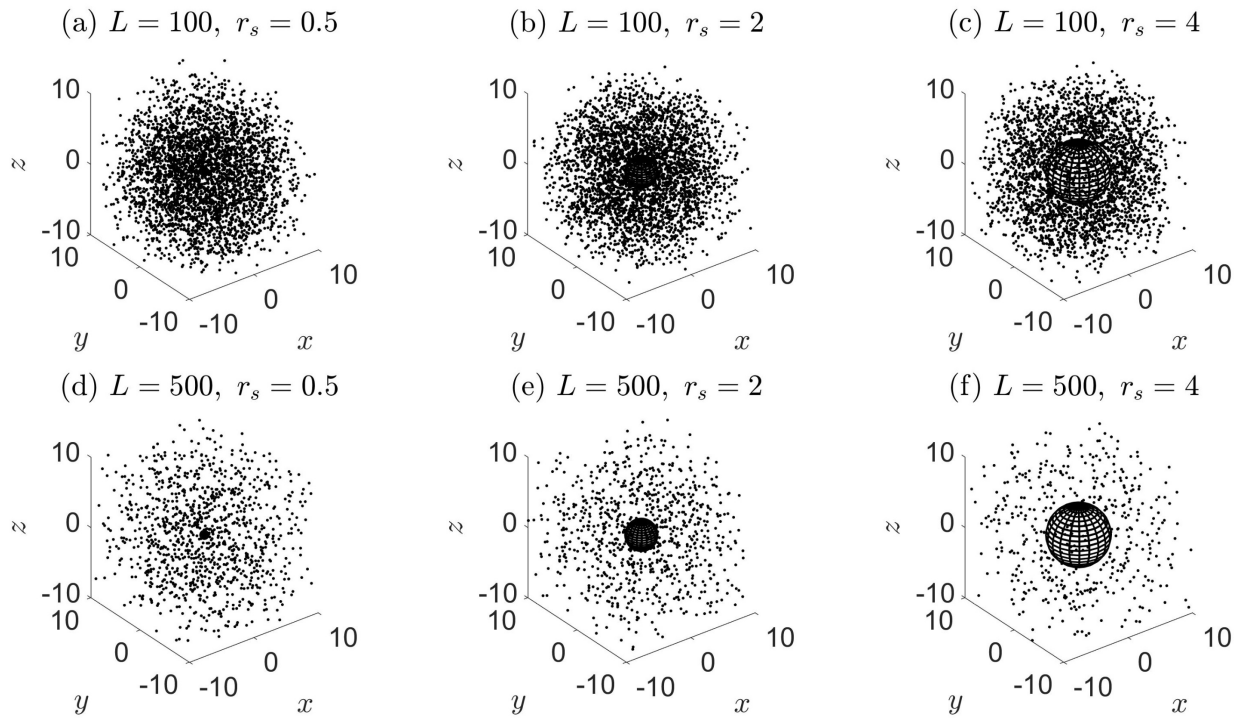

Figure 3.1.1: Snapshots of the spatial distribution in the case of spherical traps with radii  $r_s = 0.5, 2, 4$ , (surface area  $A = 3.14, 50.27, 201.06$ ), after a maximum path length of (a)-(c)  $L = 100$  and (d)-(f)  $L = 500$  has been reached. Each individual executes a SRW in unbounded space with mobility parameter  $\sigma^* = 1$  ( $S = 1.79$ ).

241 By simulating trap count data for different sized spherical traps, we can investigate whether captures  
242 are better correlated with trap surface area or trap volume. This approach can also be applied to cuboid  
243 and cylindrical traps.

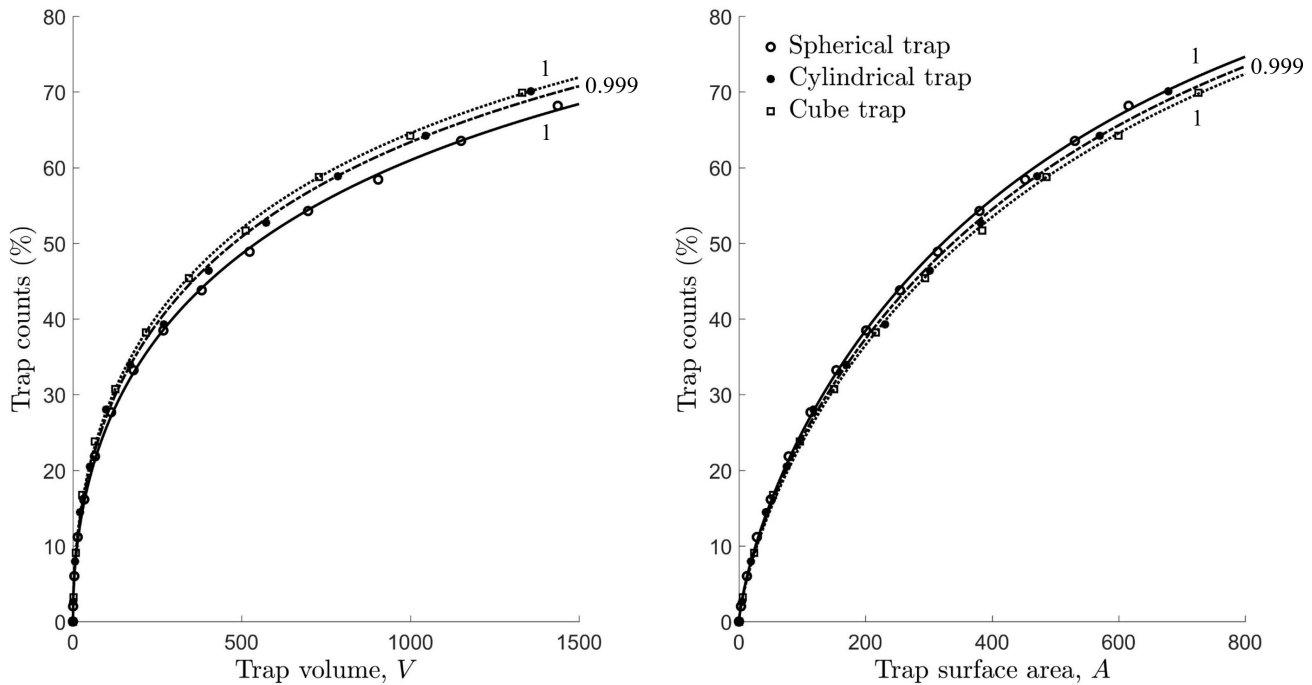

Figure 3.1.2: Cumulative trap counts as a function of (a) trap volume and (b) trap surface area, using non-linear regression. Solid curves are for the spherical trap, dashed-and-dotted curves are the cylindrical trap and dotted curves are for the cube trap. (a)  $\mathfrak{T}(V) = 100[1 - \exp(-c_0\sqrt{V})]$  with  $c_0 = 0.0297$  for the sphere with radii  $r_s = 0.5, 1, \dots, 7$ ,  $c_0 = 0.0317$  for the cylinder with radii  $r_c = 0.5, 1, \dots, 6$  ( $\epsilon_c = 1$ ), and  $c_0 = 0.0328$  for the cube with base lengths  $e_b = 1, 2, \dots, 11$  ( $\epsilon_b = 1$ ). (b) Same formula as in (a) with  $V$  expressed in terms of  $A$ , given by the equations in (2.3.7). The values noted alongside each curve are the squared correlation coefficients. The range of volumes/area considered are found from the upper bounds in (3.1.2). Simulation details: the movement type used is a SRW with  $\sigma^* = 1$  ( $S = 1.79$ ). Trap counts are recorded after a maximum path length of  $L = 500$  has been reached.

244 We considered a cube trap  $h_b = e_b$  ( $\epsilon_b = 1$ ), and a ‘normalized’ cylinder where the height is equal to the  
 245 base diameter  $h_c = 2r_c$  ( $\epsilon_c = 1$ ). The normalized cylinder and the cube lie within a sphere of radius  $R$   
 246 provided that the following inequalities apply:

$$r_c < \frac{R}{\sqrt{2}}, \quad A_c < 3\pi R^2, \quad V_c < 2\pi \left( \frac{R}{\sqrt{2}} \right)^3, \quad (3.1.1)$$

247

$$e_b < R\sqrt{\frac{4}{3}}, \quad A_b < 8R^2, \quad V_b < \left( \frac{2R}{\sqrt{3}} \right)^3, \quad (3.1.2)$$

248 which we use to determine the range of trap dimensions, areas and volumes.

249 The simulated trap counts are shown in Fig. 3.1.2. It is readily seen that the cumulative trap count

250 is a monotonously increasing, nonlinear function of trap surface area and volume. Note that the order of  
 251 trap shapes, in terms of capture efficiency, is reversed depending on whether we consider the traps to have  
 252 equal total area or volume.

### 253 3.2 Effect of trap elongation

254 In the following, we investigate the variation in trap counts for different configurations of spheroidal,  
 255 cylindrical and cuboid traps, assuming the same total surface area or volume.

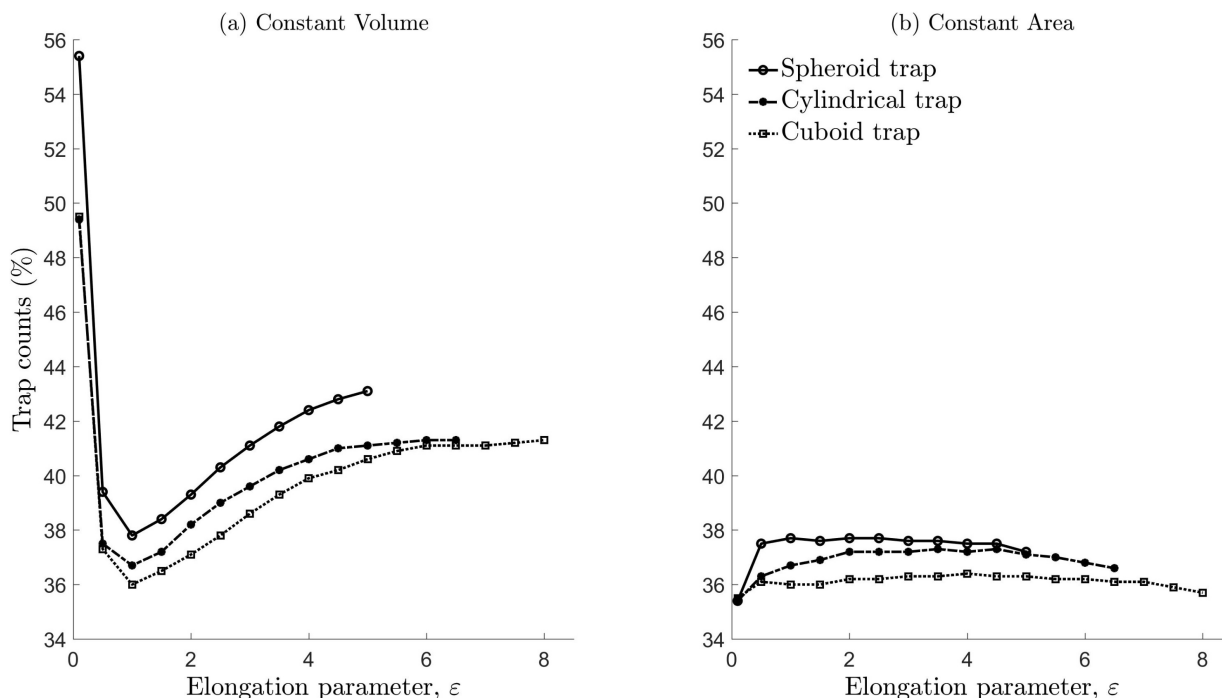

Figure 3.2.1: Trap captures (%) for spheroid, cylindrical and cuboid traps. (a) Each trap type has the same volume: spheroid  $V = 265.96$ , cylinder  $V = 217.16$  and cuboid  $V = 192.45$ , corresponding to an area  $A = 200$  for elongation parameter equal to 1. (b) All traps have the same surface area  $A = 200$ . The range of  $\varepsilon$  values considered has upper bounds  $\varepsilon_s \leq 5$ ,  $\varepsilon_c \leq 6.5$  and  $\varepsilon_b \leq 8$  so that all traps lie within a sphere of radius  $R = 10$ . The movement type considered is a SRW with  $\sigma^* = 1$  ( $S = 1.79$ ), and each walker is allowed to travel up to a maximum path length  $L = 500$ . All other details regarding the simulation setting are the same as in the caption of Fig. 3.3.1.

256 Trap counts for a given volume and a given trap shape (Fig. 3.2.1a) varies a lot, but the variation as a  
 257 function of the elongation parameter is mainly due to a variation of area. Indeed, the sharp increase in the  
 258 trap count seen in Fig. 3.2.1a for small  $\varepsilon$  is an immediate consequence of the fact that the decrease in  $\varepsilon$  to



259 values  $\varepsilon \ll 1$  makes the shape almost flat. In order to preserve the volume, the area then becomes large.  
 260 On the contrary, when the area is kept constant for all trap shape types and elongation parameter, we found  
 261 that the number of captures does not vary much (Fig. 3.2.1b). In this context, spheroidal traps slightly  
 262 outperform cylindrical and cuboid traps in terms of capture efficiency. As elongation has no noticeable  
 263 effect (for each type of trap) whereas this factor changes the volume for a given area, it makes sense to  
 264 consider traps with the same area for subsequent analyses of the possible effects of short-term persistence,  
 265 long-term directional bias and diffusion of the walk.

### 266 3.3 No effect of short-term persistence when diffusion is kept constant

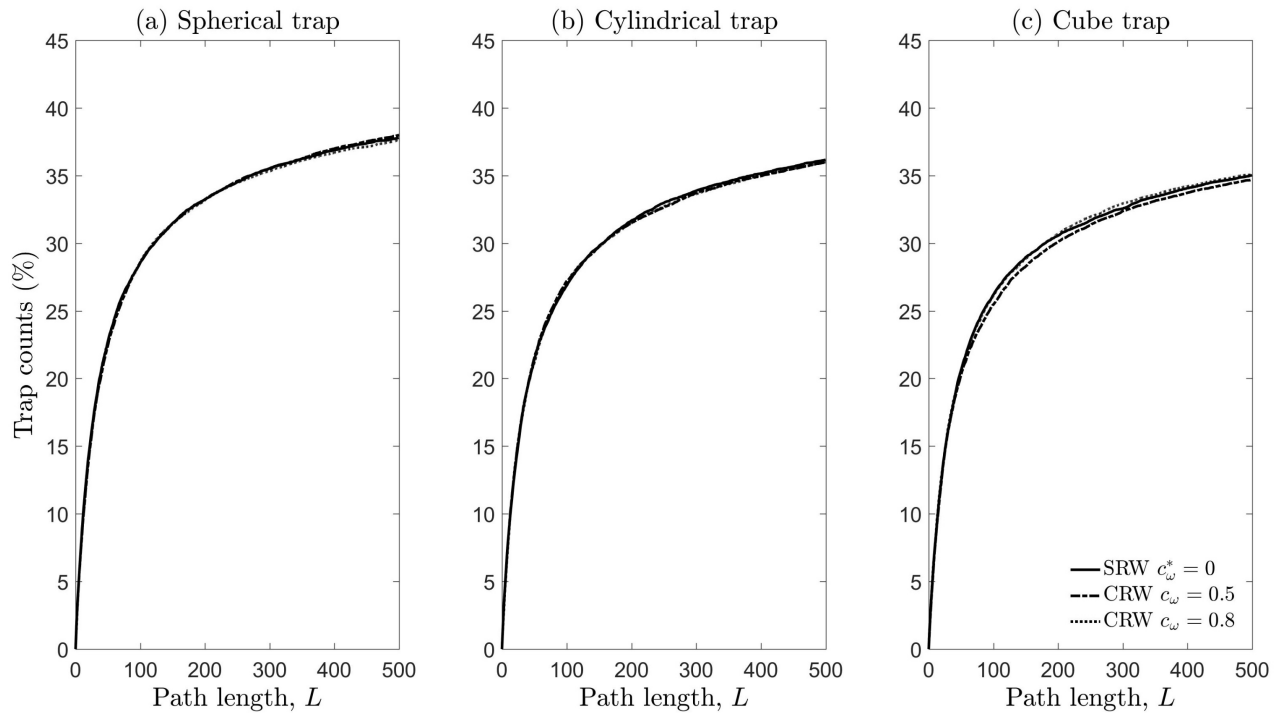

Figure 3.3.1: Captures (%) plotted against path length  $L$ . Trap geometries considered are (a) spherical  $r_s = 3.9894$  ( $\varepsilon_s = 1$ ), (b) cylindrical  $r_c = 3.2574$  ( $\varepsilon_c = 1$ ) and (c) cube  $e_b = 5.7735$  ( $\varepsilon_b = 1$ ) with equal surface area  $A = 200$ . Initial population is homogeneously distributed over the volume outside the trap and within a sphere of radius  $R = 10$ . Movement types considered are SRW with mean cosine  $c_\omega^* = 0$ ,  $\kappa^* = 0$  and  $\sigma^* = 1$ , CRW with  $c_\omega = 0.5$ ,  $\kappa = 1.7968$ ,  $\sigma = 0.3707$ , and CRW with  $c_\omega = 0.8$ ,  $\kappa = 4.9977$ ,  $\sigma = 0.1284$ . Scale parameters are chosen so that each movement type has the same sinuosity ( $S = 1.79$ ) and therefore the same MSD after a large number of steps for a given path length (see equations (2.2.7) and (2.2.8)).

267 Fig. 3.3.1 demonstrates that the inclusion of short-term persistence results in identical trap counts, assum-  
 268 ing that all individuals perform a path with the same diffusion and same maximum path length irrespective  
 269 of trap geometry.

### 270 3.4 Effect of diffusion

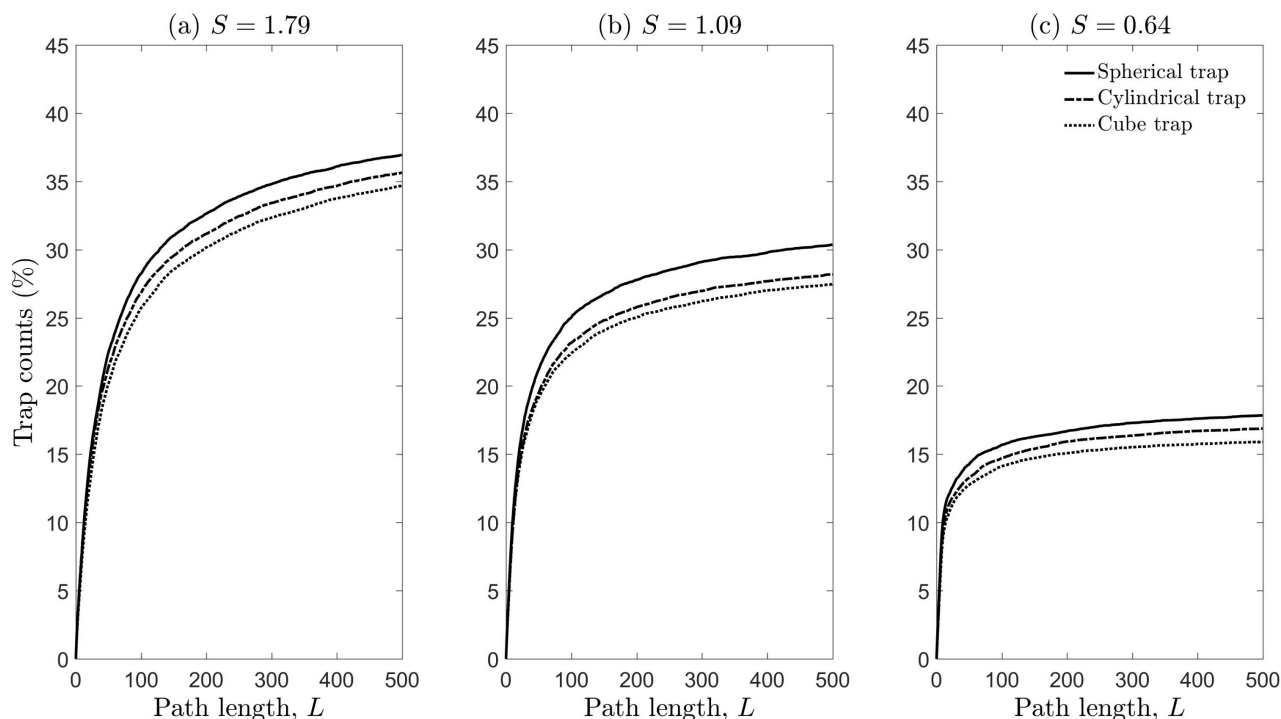

Figure 3.4.1: Captures (%) plotted as a function of path length for a Spherical, Cube and Cylindrical trap with mean cosines (a)  $S = 1.79$  ( $c_\omega^* = 0$ ), (b)  $S = 1.09$  ( $c_\omega = 0.5$ ) and (c)  $S = 0.64$  ( $c_\omega = 0.8$ ). Contrary to what occurs in Fig. 3.3.1, the scaling parameter was the same for all walks ( $\sigma^* = \sigma = 1$ ) so that the diffusion increases with  $c_\omega$ .

271 Fig. 3.4.1 confirms that spherical traps are, on average, the most efficient. Trap counts decrease with  
 272 increasing diffusion, as soon as the maximum path length is sufficiently long. We observe small but  
 273 noticeable differences in efficiencies on comparing the cube and cylindrical traps. This indicates that the  
 274 impact of trap geometry can be important in this case. Also, we note that trap counts accumulate much  
 275 slower if diffusion is low, and given that the path length is small. This has an intuitive interpretation that  
 276 individuals, on average, do not have enough time to approach the trap.

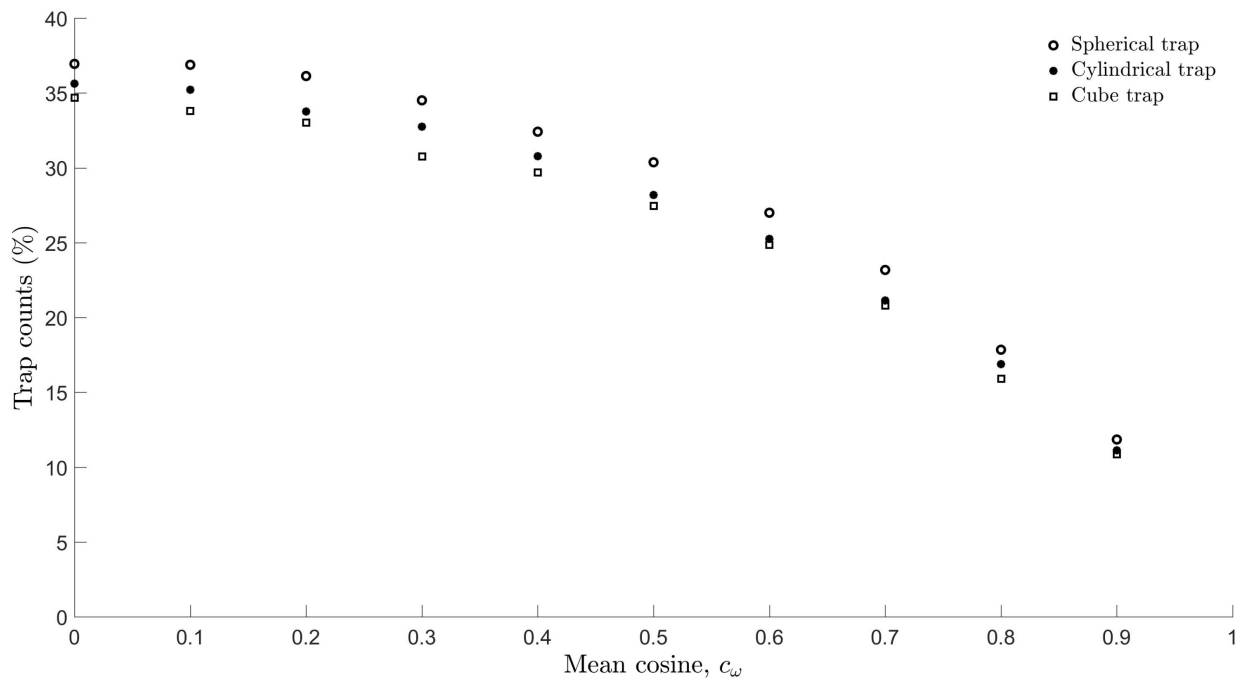

Figure 3.4.2: Captures (%) as a function of mean cosines for a Spherical, Cube and Cylindrical trap. Sinuosity values range from  $S = 1.79$  for  $c_\omega^* = 0$  to  $S = 0.44$  for  $c_\omega = 0.9$ . All details are the same as that described in the caption of Fig. 3.4.1.

277 Fig. 3.4.2 shows that trap counts decrease, on average, with increasing mean cosine (i.e. increasing  
278 short-term persistence/diffusion), for all trap shapes. It is worth noting that, when diffusion is large,  
279 trap count differences decrease, implying that the impact of trap geometry is then not that important. For  
280 relatively smaller values of diffusion, there is a clear hierarchy of trap shape in terms of trapping efficiency,  
281 with the spherical trap retaining the most counts, followed by the cylindrical trap, and then the cube.

### 282 3.5 Effect of long-term bias

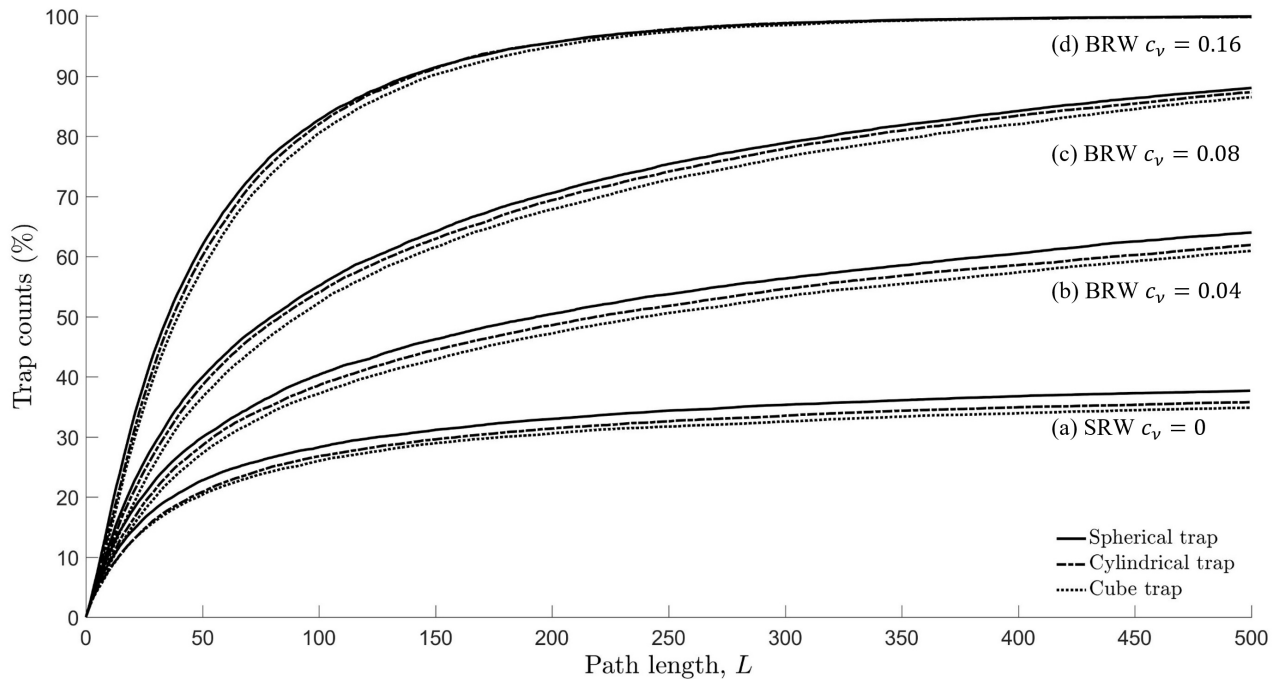

Figure 3.5.1: Captures (%) plotted against path length  $L$  for different trap types. Movement types considered: (a) SRW with mean cosine  $c_v^* = 0$ ,  $\kappa^* = 0$  and  $\sigma^* = 1$ , (b) BRW  $c_v = 0.04$ ,  $\kappa' = 0.1201$ ,  $\sigma' = 1.0009$ , (c) BRW  $c_v = 0.08$ ,  $\kappa' = 0.2409$ ,  $\sigma' = 1.0038$ , (d) BRW  $c_v = 0.16$ ,  $\kappa' = 0.4876$ ,  $\sigma' = 1.0233$ . Scale parameters are chosen so that the BRW is asymptotically equivalent to a SRW in terms of diffusion. All other details, such as trap dimensions, are exactly the same as in the caption of Fig. 3.4.1.

283 Fig. 3.5.1 shows that the presence of long-term bias towards the trap, as expected, dramatically increases  
 284 captures. There is a clear hierarchy of trap shapes in terms of capture efficiency.

## 285 4 Discussion

286 Dispersal and movement are fundamental for understanding the distribution and abundance of species in  
 287 ecosystems. All species change their location in space at least during some stages of their life. Movement  
 288 is known to have fundamental implications for individual survival, behaviours and reproduction, the pop-  
 289 ulation dynamics, and on fitness and evolution (Clobert et al., 2001; Bullock et al., 2002). The capacity  
 290 for movement is prolific across different species. For instance, while plants do not normally move, their  
 291 seeds and spores do and can cover considerable distances before settling down. Insect eggs and pupae do

292 not move, but larvae and/or adults move most of the time, e.g. to forage for food. Most vertebrates move  
293 practically all their life, e.g. to forage, to avoid predators, to look for a mating partner, etc. Understanding  
294 of the typical movement patterns is therefore a major focus of ecology and population biology (Turchin,  
295 1998).

296 Among many research tools available to study individual animal movement, mathematical modelling  
297 plays an increasingly important role (Turchin, 1998; Codling et al., 2008). Random walks (RWs) are  
298 appropriate approaches for understanding species movement patterns particularly as a stochastic or sta-  
299 tistical description of dispersal. They are easy to implement: it is rather straightforward to investigate  
300 movement paths using computer simulations based on RWs. More importantly, by considering individual  
301 movement as a stochastic process, it is often possible to obtain a general analytical description, in terms of  
302 the dispersal kernel and/or the statistical moments, as functions of time, and thus to reveal generic prop-  
303 erties of different movement behaviours (Reynolds, 2010; Codling and Plank, 2011; James et al., 2011;  
304 McClintock et al., 2012; Tilles and Petrovskii, 2015; Tilles et al., 2017). While there has recently been  
305 considerable progress in understanding these issues, most theoretical studies on animal movement have  
306 been predominantly limited to 2D cases. Meanwhile, in the real-world application of monitoring flying  
307 insects (e.g. different taxa of fruit flies), traps are usually elevated above the ground, sometimes at a signif-  
308 icant height, for e.g. 1-10 metres (Epsky et al., 2004). Thus, the movement of flying insects in the vicinity  
309 of an elevated trap is essentially performed in 3D space, and hence it should be modelled as such.

310 Understanding the efficiency of trapping resulting from the interplay between the movement pattern  
311 (as described by the SRW, CRW and BRW) and the shape of the trap was the focus of this study. We  
312 first derived the expression for the MSD as a function of time (or number of steps), and conditions of  
313 equivalence between RWs with different step size distributions were obtained in terms of diffusion. We  
314 then proceeded to numerical simulations of trap counts with traps of different shapes commonly used in  
315 ecological studies, i.e. spheroid, cylinder and cuboid. As one result of immediate practical importance, we  
316 revealed the non-linear dependence of trap counts on the geometry of traps, quantified by either the area  
317 of the trap surface or the trap volume, and provided corresponding analytical expressions useful for trap  
318 count estimations (see Fig. 3.1.2). On considering trap elongation, we found that trap counts do not vary  
319 much given that the surface area is fixed, and that there is a clear hierarchy in terms of which traps are more  
320 efficient, with the spheroidal trap outperforming the cylindrical trap, followed by the cuboidal trap (see

321 Fig. 3.2.1). Also, rather counter-intuitively, we showed that the short-term persistence of the individual  
322 movement ('micro-structure') does not have any notable effect on the trap counts when the diffusion is  
323 kept constant (see Fig. 3.3.1), and it turns out that only the 'macro-structure' is important (see Figs. 3.4.1  
324 and 3.4.2).

325 One application of movement models arises from the needs of ecological monitoring (Greenslade,  
326 1964; Byers, 2012; Siewers et al., 2014; Miller et al., 2015). Monitoring of invertebrates, insects in  
327 particular, is often performed by installing traps and then interpreting trap counts (catches). The latter,  
328 however, appears to be a challenging problem. It is deceptively easy to interpret the trap counts in the  
329 relative way, i.e. 'larger count implies larger population', but this can be misleading or simply wrong  
330 because of the interplay between the movement activity and the population density: a small population  
331 of fast moving animals can result in the same trap count as a large population of slower moving animals  
332 (cf. 'activity-density paradigm' (Thomas et al., 1998)). An absolute interpretation of trap counts relating  
333 them to the population density in the vicinity of the trap is possible (Petrovskii et al., 2012, 2014; Ahmed  
334 and Petrovskii, 2019) but it requires a succession of several trap counts and some information about the  
335 movement pattern such as the frequency distribution of step sizes and turning angles along the path (also  
336 the distribution of different movement modes, rest time, etc., in case of more complicated movement  
337 behaviours) as well as a good understanding of the effect of trap geometry (Ahmed and Petrovskii, 2019).

338 Furthermore, in the statistical application of models to ecological data, a pervasive and recurrent prob-  
339 lem is understanding the biases introduced through the measurement or observation of the ecological  
340 system (e.g. Hilborn and Mangel, 1998; de Valpine and Hastings, 2002). More accurate estimates of the  
341 number of individuals that move or are present in a given location require the use of mathematical tools.  
342 Many distance sampling methods have been developed (Buckland et al., 2015) to link observations on  
343 counts of individuals to estimates of population size. More recently Bayesian hierarchical methods (e.g  
344 Doucet et al., 2001; Bonsall et al., 2014; Kantas et al., 2015; Bonsall et al., 2020) have been developed  
345 and applied in an ecological context to approach the decomposition of error into measurement and process  
346 components. The mathematical frameworks we develop here, provide a richer set of tools to be able to  
347 relate how the biases in individual behaviours influence measurement error problems and hence provide  
348 more robust determinants of population level measures. With a more detailed understanding of the effects  
349 of different trap geometries on capturing/detecting individuals in a population will provide more robust

350 ways in which to discern broad scale ecological patterns.

351 Coupled movement and dynamical models such as integro-difference approaches (Kot and Schaffer,  
352 1986; Lutscher, 2019) have widespread application in ecology for understanding invasion speeds (e.g.  
353 Kot, 1992), Allee effects (e.g. Wang et al., 2002), climate change (e.g. Zhou and Kot, 2011) and invasive  
354 species control (e.g. Kura et al., 2019). All rely on a dispersal kernel to relate movement from one location  
355 to another (e.g. Reimer et al., 2016, 2017) and the influence this has on the population dynamics. This  
356 dispersal kernel is critical for ensuring model predictions can be accurately validated against experiments  
357 and/or observations. Our work on 3D RWs now provides a way in which to scale up from individual move-  
358 ment rules to generate appropriately formulated dispersal kernels. Furthermore, the individual basis to the  
359 movement and dispersal patterns provides an alternative approach to link movement and the population  
360 dynamics without recourse to simpler mean-field approaches.

361 A question may arise as to why one should use RWs to model explicitly hundreds or thousands of  
362 randomly moving animals rather than the corresponding mean-field mathematical description instead. If  
363 the potential ecological applications of our work is somewhat obvious, several methodological questions  
364 remain unresolved. It is well-known that, for the SRW, the dynamics of the population density distribution  
365 over space is described by the diffusion equation (Kareiva and Shigesada, 1983; Ahmed, 2015) and for  
366 the CRW, by the Telegraph equation, (e.g. see Turchin, 1998; Codling et al., 2008). However, note that  
367 the analytical solution of the diffusion equation, from which the average trap count can be calculated (see  
368 Petrovskii et al., 2012, 2014; Ahmed and Petrovskii, 2015) is, even in case of relatively simple trap shapes  
369 such as a spheroid or cylinder, only available as a Fourier series where the exponents (the eigenvalues of  
370 the corresponding boundary problem) still need to be found numerically. With the reliance on numerical  
371 approximations and approaches, the ‘analytical’ description of trap counts is not much different from that  
372 derived from the individual based model. In the case of more realistic movement described by the CRW,  
373 the situation is actually much more complex, as the solutions of the boundary problem for the Telegraph  
374 equation in the general case are not positively defined (Tilles and Petrovskii, 2019). Simulation of trap  
375 counts using individual based models therefore provides a robust and plausible alternative to analytical  
376 approaches.

## 377 **5 Conclusion**

378 In conclusion, these issues notwithstanding, we have shown how different trap geometries and the 3D  
379 movement of individuals can bias trapping efficiency. Understanding how diffusion, directed movement  
380 and trap shape can affect counts, estimates and observations has critical implications for spatial ecology  
381 and for understanding the distribution and abundance of species. These individual based, geometric ap-  
382 proaches warrant further investigation and application in problems in contemporary spatial ecology. The  
383 next natural step that we hope to see in the near future, is analyses of real flying animal movements using  
384 3D RW models.

## 385 **Abbreviations**

386 3D: Three-dimensional; SRW: Simple random walk; CRW: Correlated random walk; BRW: Biased ran-  
387 dom walk

## 388 **Acknowledgements**

389 DAA is thankful to Philip Maini (Oxford, UK) for a fruitful and stimulating discussion which helped  
390 improve the manuscript.

## 391 **Author contributions**

392 DAA and SB participated in the design of the study, conducted the simulations, analysed the results,  
393 drafted and critically revised the manuscript. MBB and SVP participated in the interpretation and discus-  
394 sion of results and also critically revised the manuscript. All authors gave final approval for publication  
395 and agree to be held accountable for the work performed therein.

## 396 **Funding**

397 This work was funded by the Kuwait Foundation for the Advancement of Sciences (KFAS) [Grant number:  
398 PR1914SM-01] and the Gulf University for Science and Technology (GUST) internal seed fund [Grant  
399 Number: 187092].



## 400 **Ethical Approval and Consent to participate**

401 Not applicable.

## 402 **Consent for publication**

403 Not applicable.

## 404 **Availability of supporting data**

405 Not applicable.

## 406 **Competing interests**

407 The authors declare that they have no competing interests.

## 408 **References**

- 409 Ahmed, D. (2015). *Stochastic and Mean field approaches for trap counts modelling and interpretation*. PhD thesis, University  
410 of Leicester, UK.
- 411 Ahmed, D. and Petrovskii, S. (2015). Time Dependent Diffusion as a Mean Field Counterpart of Lévy Type Random Walk.  
412 *Math. Model. Nat. Phenom.*, 10(2):5 – 26.
- 413 Ahmed, D. and Petrovskii, S. (2019). Analysing the impact of trap shape and movement behaviour of ground-dwelling arthro-  
414 pods on trap efficiency. *Methods Ecol. Evol.*, 10(8):1246 – 1264.
- 415 Bailey, J., Wallis, J., and Codling, E. (2018). Navigational efficiency in a biased and correlated random walk model of individual  
416 animal movement. *Ecology*, 99(1):217 – 223.
- 417 Benhamou, S. (2004). How to reliably estimate the tortuosity of an animal's path: straightness, sinuosity, or fractal dimension?  
418 *Journal of Theoretical Biology*, 229(2):209 – 220.
- 419 Benhamou, S. (2006). Detecting an orientation component in animal paths when the preferred direction is individual-dependent.  
420 *Ecology*, 87(2):518 – 528.
- 421 Benhamou, S. (2018). Mean squared displacement and sinuosity of three-dimensional random search movements. *arXiv*  
422 *1801.02435*. Retrieved from <http://arxiv.org/abs/1801.02435>.
- 423 Bonsall, M., Dooley, C., Kasparson, A., Brereton, T., Roy, D., and Thomas, J. (2014). Allee effects and the spatial dynamics of  
424 a locally endangered butterfly, the high brown fritillary (*argynnis adippe*). *Ecol. Appl.*, 24:108 – 20.
- 425 Bonsall, M., Froyd, C., and Jeffers, E. (2020). Resilience: nitrogen limitation, mycorrhiza and long-term palaeoecological  
426 plantnutrient dynamics. *Biol. Letts.*, (20190441).
- 427 Bovet, P. and Benhamou, S. (1988). Spatial analysis of animals' movements using a correlated random walk model. *J. Theor.*  
428 *Biol.*, 131(4):419 – 433.

- 429 Brown, G. and Matthews, I. (2016). A review of extensive variation in the design of pitfall traps and a proposal for a standard  
430 pitfall trap design for monitoring ground-active arthropod biodiversity. *Ecol. Evol.*, 6(12):3953 – 64.
- 431 Buckland, S., Rexstad, E., Marques, T., and Oedekoven, C. (2015). *Distance Sampling: Methods and Applications*. Springer  
432 International.
- 433 Bullock, J., Kenward, R., and Hails, R. (2002). *Dispersal Ecology*. Blackwell Science, Malden, Massachusetts, USA.
- 434 Byers, J. (2001). Correlated random walk equations of animal dispersal resolved by simulation. *Ecology*, 82(6):1680 – 90.
- 435 Byers, J. (2011). Analysis of vertical distributions and effective flight layers of insects: Three-dimensional simulation of flying  
436 insects and catch at trap heights. *Environmental Entomology*, 40(5):1210 – 1222.
- 437 Byers, J. (2012). Estimating insect flight densities from attractive trap catches and flight height distributions. *J Chem Ecol*,  
438 38(5):592 – 601.
- 439 Clobert, J., Danchin, E., Dhondt, A., and Nichols, J. (2001). *Dispersal*. Oxford University Press, Oxford.
- 440 Codling, E. and Plank, M. (2011). Turn designation, sampling rate and the misidentification of power laws in movement path  
441 data using maximum likelihood estimates. *Theor. Ecol.* 4.3 (2011): 397-406., 4(3):397 – 406.
- 442 Codling, E., Plank, M., and Benhamou, S. (2008). Random walk models in biology. *J. R. Soc. Interface*, 5(25):813 – 834.
- 443 Crank, J. (1975). *The mathematics of diffusion*. Oxford University Press, 2nd edition.
- 444 de Margerie, E., Pichot, C., and Benhamou, S. (2018). Volume-concentrated searching by an aerial insectivore, the common  
445 swift (*apus apus*). *Anim. Behav.*, 136:159 – 172.
- 446 de Valpine, P. and Hastings, A. (2002). Fitting population models incorporating process noise and observation error. *Ecological*  
447 *Monographs*, 72(1):57 – 76.
- 448 Doucet, A., Nando de, F., and Gordon, N. (2001). *Sequential Monte Carlo Methods in Practice*. Springer Verlag.
- 449 Duan, J. and Prokopy, R. (1994). Apple maggot fly response to red sphere traps in relation to fly age and experience. *Ento-*  
450 *mologia Experimentalis et Applicata*, 73(3):279 – 287.
- 451 Epsky, N., Morrill, W., and Mankin, R. (2004). *Traps for Capturing Insects*. Springer, Dordrecht. In: Encyclopedia of  
452 Entomology.
- 453 Fisher, N., Lewis, T., and Willcox, M. (1981). Tests of discordancy for samples from fisher's distribution on the sphere. *Journal*  
454 *of Applied Statistics*, 30(3):230 – 237.
- 455 Fortin, D., Morales, J., and Boyce, M. (2005). Elk winter foraging at fine scale in yellowstone national park. *Oecologia*,  
456 145(335 – 343).
- 457 Greenslade, P. (1964). Pitfall Trapping as a Method for Studying Populations of Carabidae (Coleoptera). *J. Animal Ecol.*,  
458 33(2):301 – 310.
- 459 Grimmet, R. and Stirzaker, D. (2001). *Probability and Random processes*. Oxford University Press.
- 460 Hall, R. (1977). Amoeboid movements as a correlated walk. *J. Math. Biol.*, 4:327 – 335.
- 461 Hilborn, R. and Mangel, M. (1998). *The Ecological Detective*. Princeton University Press, Princeton, NJ.
- 462 James, A., Plank, M., and Edwards, A. (2011). Assessing Lévy walks as models of animal foraging. *J. R. Soc. Interface*,  
463 8(62):1233 – 1247. <https://doi.org/10.1098/rsif.2011.0200>.
- 464 Kantas, N., Doucet, A., Singh, S., Maciejowski, J., and Chopin, N. (2015). On particle methods for parameter estimation in  
465 state-space models. *Statistical Science*, 30:328 – 351.
- 466 Kareiva, P. and Shigesada, N. (1983). Analyzing insect movement as a correlated random walk. *Oecologia*, 56(2 – 3):234 –  
467 238.

- 468 Kent, J. (1982). The fisher-bingham distribution on the sphere. *J.R. Statist. Soc. B.*, 44(1):71 – 80.
- 469 Kirkpatrick, D., McGhee, P., Gut, L., and Miller, J. (2017). Improving monitoring tools for spotted wing drosophila, *drosophila*  
470 *suzukii*. *Entomologia Experimentalis et Applicata*, 164(2):87 – 93.
- 471 Kot, M. (1992). Discrete-time travelling waves: ecological examples. *Journal of Mathematical Biology*, 30:413 – 436.
- 472 Kot, M. and Schaffer, W. (1986). Discrete-time growth-dispersal models. *Mathematical Biosciences*, 80(1):109 – 136.
- 473 Kura, K., Khamis, D., Mouden, C., and Bonsall, M. (2019). Optimal control for disease vector management in sit models: an  
474 integrodifference equation approach. *J. Math. Bio.*, 78:1821 – 39.
- 475 Lamarre, G., Molto, Q., P.V.A., F., and Baraloto, C. (2012). A comparison of two common flight interception traps to survey  
476 tropical arthropods. *ZooKeys*, 216:43 – 55.
- 477 Le Bras, Y., Joumaa, J., and Guinet, C. (2017). Three-dimensional space use during the bottom phase of southern elephant seal  
478 dives. *Movement Ecology*, 5(18).
- 479 Lin, C. C. and Segel, L. A. (1974). *Mathematics applied to deterministic problems in the natural sciences*. New York, NY:  
480 Macmillan.
- 481 Lutscher, F. (2019). *Integrodifference Equations in Spatial Ecology*. Springer.
- 482 Mardia, K. and Jupp, P. (2000). *Directional Statistics*. John Wiley and Sons, Chichester.
- 483 Mardia, K., Kent, J., and Bibby, J. (1979). *Multivariate Analysis*. San Diego: Academic Press.
- 484 Marsh, L. and Jones, R. (1988). The form and consequences of random walk movement models. *J. Theor. Bio.*, 133:113 – 131.
- 485 McClintock, B., King, R., Thomas, L., Matthiopoulos, J., McConnell, B., and Morales, J. (2012). A general discrete-time  
486 modeling framework for animal movement using multistate random walks. *Ecological Monographs*, 82:335 – 349.
- 487 Miller, J., Adams, C., Weston, P., and Schenker, J. (2015). *Trapping of Small Organisms Moving Randomly. Principles and*  
488 *Applications to Pest Monitoring and Management*. United States: Springer. Springer briefs in ecology.
- 489 Mondor, E. (1995). Syrphid captures on red sphere traps deployed for the apple maggot fly, *rhagoletis pomonella* (walsh).  
490 *Ecoscience*, 2(2):200 – 202.
- 491 Morales, J., Haydon, D., Frair, J., Holsinger, K., and Fryxell, J. (2004). Extracting more out of relocation data: building  
492 movement models as mixtures of random walks. *Ecology*, 85(9):2436 – 45.
- 493 Muirhead-Thomson, R. (1991). *Trap Responses of Flying Insects*. Elsevier. The Influence of Trap Design on Capture Efficiency.
- 494 Nathan, R., Getz, W., Revilla, E., Holyoak, M., Kadmon, R., and Saltz, D. (2008). A movement ecology paradigm for unifying  
495 organismal movement research. *Proc Natl Acad Sci USA*, 105:19052 – 9.
- 496 Okubo, A. (1980). *Diffusion and Ecological Problems: Mathematical Models*. Springer, Berlin.
- 497 Patlak, C. (1953). Random walk with persistence and external bias. *Bulletin of Mathematical Biophysics*, 15:311 – 338.
- 498 Petrovskii, S., Bearup, D., Ahmed, D., and Blackshaw, R. (2012). Estimating insect population density from trap counts. *Ecol.*  
499 *complexity*, 10:69 – 82.
- 500 Petrovskii, S., Petrovskya, N., and Bearup, D. (2014). Multiscale approach to pest insect monitoring: random walks, pattern  
501 formation, synchronization and networks. *Phys. Life Rev.*, 11(3):467 – 525.
- 502 Radcliffe, E., Hutchison, W., and Cancelado, R. (2008). *Integrated pest management: Concepts, tactics, strategies and case*  
503 *studies*. Cambridge University Press.
- 504 Reimer, J., Bonsall, M., and Maini, P. (2016). Approximating the critical domain size of integrodifference equations. *Bulletin*  
505 *of Mathematical Biology*, 78:72 – 109.

- 506 Reimer, J., Bonsall, M., and Maini, P. (2017). The critical domain size of stochastic population models. *J. Math. Bio.*, 74:755  
507 – 782.
- 508 Reynolds, A. (2010). Bridging the gulf between correlated random walks and lévy walks: autocorrelation as a source of lévy  
509 walk movement patterns. *J R Soc Interface*, 7:1753 – 1758.
- 510 Robacker, D. and Rodriguez, M. (2004). A simple and effective cylindrical sticky trap for fruit flies (diptera: Tephritidae). *The*  
511 *Florida Entomologist*, 87(4):492 – 495.
- 512 Schultz, C. and Crone, E. (2001). Edge-mediated dispersal behaviour in a prairie butterfly. *Ecology*, 82:1879 – 1892.
- 513 Siewers, J., Schirmel, J., and Buchholz, B. (2014). The efficiency of pitfall traps as a method of sampling epigeal arthropods in  
514 litter rich forest habitats. *Eur. J. Entomol.*, 111(1):69 – 74. doi: 10.14411/eje.2014.008.
- 515 Sivinski, J. (1990). Colored spherical traps for capture of caribbean fruit fly, *anastrepha suspensa*. *The Florida Entomologist*,  
516 73(1):123.
- 517 Sornette, D. (2004). *Critical Phenomena in Natural Sciences*. Berlin, Springer, 2nd edition.
- 518 Southwood, T. (1978). *Ecological Methods*. Chapman and Hall, London, 2nd edition.
- 519 Taylor, L. (1962). The efficiency of cylindrical sticky insect traps and suspended nets. *Annals of Applied Biology*, 50(4):681 –  
520 685.
- 521 Tchen, C. (1952). Random flight with multiple partial correlations. *J. Chem. Phys.*, 20:214.
- 522 Thomas, C., Parkinson, L., and Marshall, E. (1998). Isolating the components of activity-density for the carabid beetle *Pterostichus*  
523 *melanarius* in farmland. *Oecologia*, 116(1 – 2):103 – 112.
- 524 Tilles, P. and Petrovskii, S. (2015). Statistical mechanics of animal movement: animals’s decision-making can result in su-  
525 perdiffusive spread. *Ecol. Compl.*, 22:86–92.
- 526 Tilles, P. and Petrovskii, S. (2019). On the consistency of the reaction-telegraph process within finite domains. *J. Stat. Phys.*,  
527 177:569–587.
- 528 Tilles, P., Petrovskii, S., and Natti, P. (2017). A random acceleration model of individual animal movement allowing for  
529 diffusive, superdiffusive and superballistic regimes. *Scientific Reports*, 7:14364.
- 530 Turchin, P. (1998). *Quantitative analysis of movement. Measuring and modelling population redistribution in animals and*  
531 *plants*. Sinauer Associates, Inc. Sunderland, Massachusetts.
- 532 Voesenek, C., Pieters, R., and van Leeuwen, J. (2016). Automated reconstruction of three-dimensional fish motion, forces, and  
533 torques. *PLoS ONE*, 11. e0146682.
- 534 Walck, C. (2007). *Handbook on statistical distributions for experimentalists*. University of Stockholm Internal Report. SUF-  
535 PFY/96-01.
- 536 Wang, M., Kot, M., and Neubert, M. (2002). Integro-difference equations, allee effects, and invasions. *J. Math. Biol.*, 44(2):150  
537 – 68.
- 538 Weiss, G. H. (1994). *Aspects and applications of the random walk*. Amsterdam, The Netherlands: North Holland Press.
- 539 Williams, H., Taylor, L., Benhamou, S., Bijleveld, A., Clay, T., de Grissac, S., Demar, U., English, H., Franconi, N.,  
540 GómezyLaich, A., Griffiths, R., Kay, W., Morales, J., Potts, J., Rogerson, K., Rutz, C., Spelt, A., Trevail, A., Wilson,  
541 R., and Börger, L. (2020). Optimising the use of biologgers for movement ecology research. *Journal of Animal Ecology*.
- 542 Zhou, Y. and Kot, M. (2011). Discrete-time growth-dispersal models with shifting species ranges. *Theoretical Ecology*, 4:13 –  
543 25.
